# Supplementary material for: Fast immunoassay for microfluidic western blotting by direct deposition of reagents onto capture membrane
Source: Royal Society of Chemistry journal article supplement (doi:10.1039/d0ay00207k), 2020-01-01
Supplement: d0ay00207k1.pdf [file d0ay00207k1.pdf]

Supplementary Material for:

### Fast Immunoassay for Microfluidic Western Blotting by Direct Deposition of Reagents onto Capture Membrane

Natalie E. Arvin, Mohamed Dawod, Don T. Lamb, Jon P. Anderson, Michael D. Furtaw, and Robert T. Kennedy

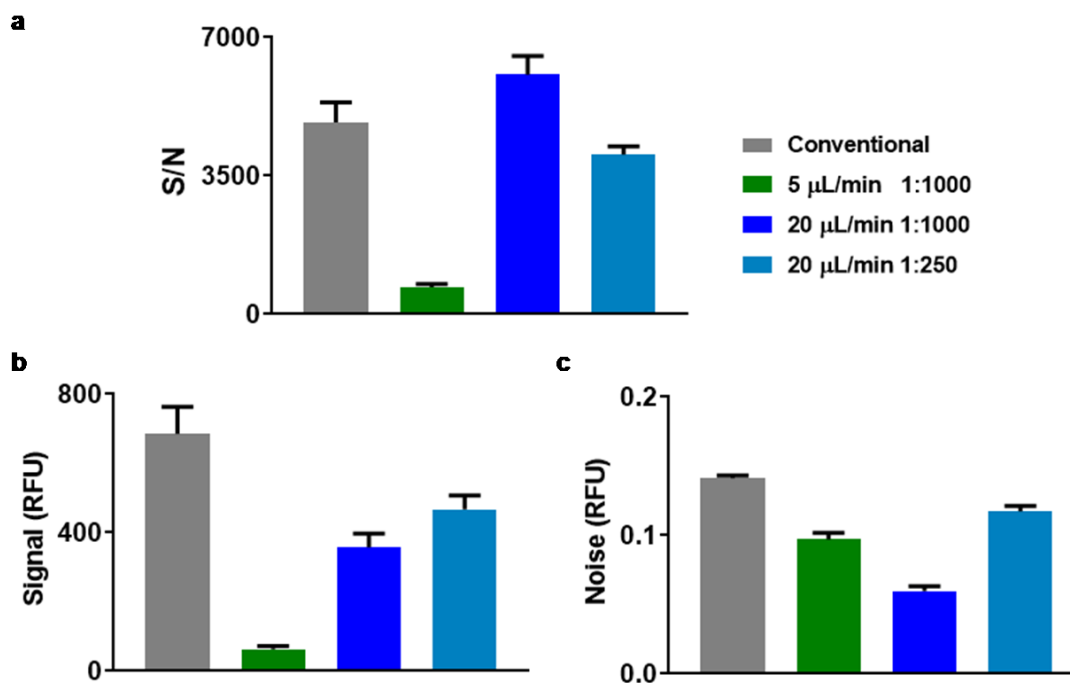

Figure S1. Investigation of primary antibody deposition parameters where all steps followed the microscale immunoassay method except for secondary antibody incubation which was applied with a traditional incubation step. Investigation of antibody deposition indicated that flow rates from 5-20  $\mu\text{L}/\text{min}$  with stage speeds from 2-8 mm/min were adequate for completely saturating the width of a deposited protein trace. Primary antibody deposition was investigated between parameters of 5 and 20  $\mu\text{L}/\text{min}$ , and the results shown here were at the selected stage speed of 4 mm/min for 50  $\mu\text{g}/\text{mL}$  actin dot blotted with  $n=4$  protein spots. The S/N (a), signal (b), and noise (c) values calculated and plotted are compared for selection a of deposition parameters that give the most comparable result to the traditional immunoassay. As shown, increasing the concentration of the primary antibody does not improve the S/N ratio within the selected deposition parameters.

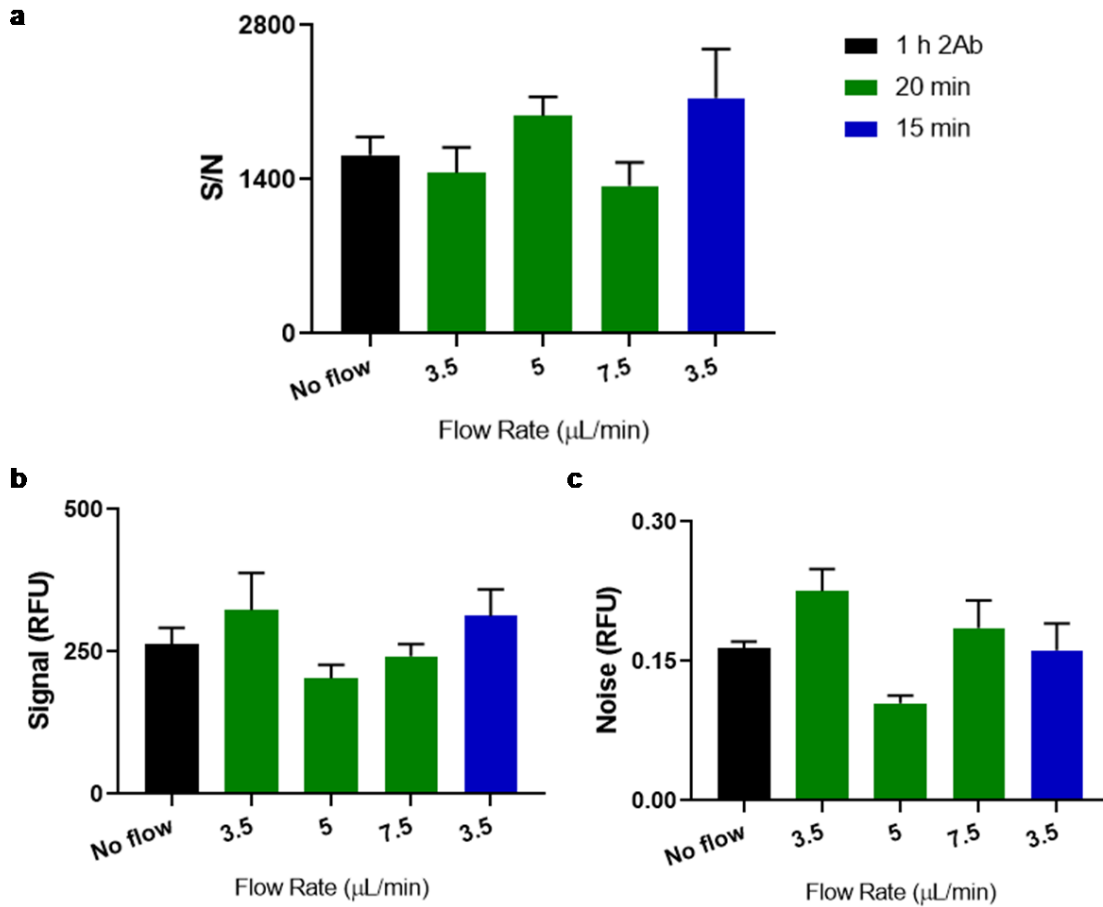

Figure S2. Investigation of secondary antibody deposition parameters where all steps are applied via the microscale, fast immunoassay method. Detection of actin 50  $\mu\text{g}/\text{mL}$  dot blotted with  $n=4$  protein spots was investigated with flow rates ranging from 3.5-7.5  $\mu\text{L}/\text{min}$  with a fast stage speed of 70 mm/min that repeated movement along the x-axis. This deposition approach produced better binding with acceptable background and noise levels. The S/N (a), signal (b), and noise (c) are compared with a modified, microscale 2 h immunoassay that had previously been determined to give comparable results to a traditional immunoassay.

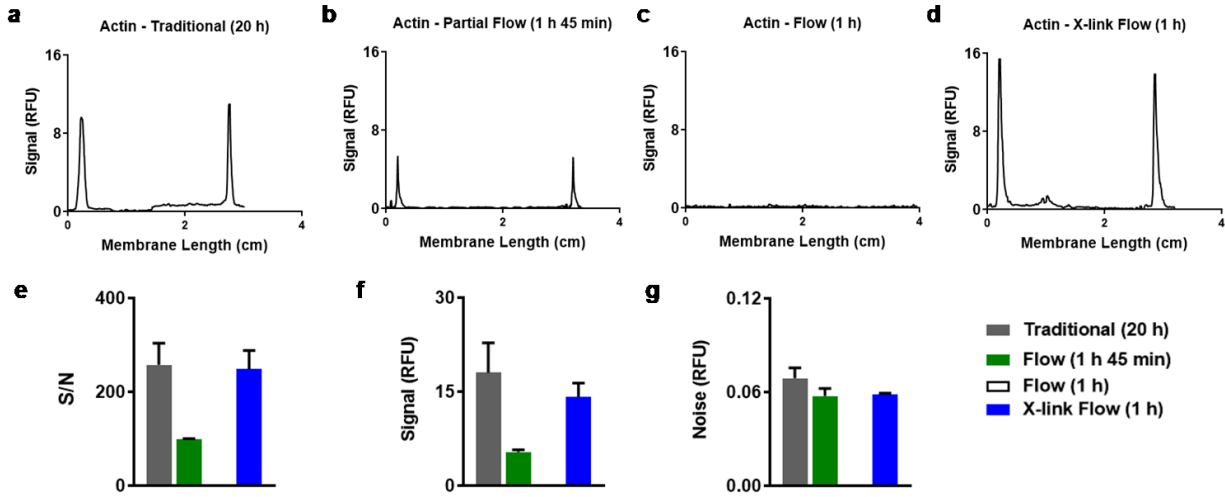

Figure S3. Comparison of a traditional immunoassay (a) with initial protein loss from non-crosslinked, partial flow immunoassay method (b), a non-crosslinked flow immunoassay (c), and a cross-linked flow immunoassay (d) for microchip Western blotting of 3.3  $\mu\text{g}/\text{mL}$  actin. The S/N (e), signal (f), and noise (g) values calculated and plotted with  $n=3$  injected and separated protein peaks.

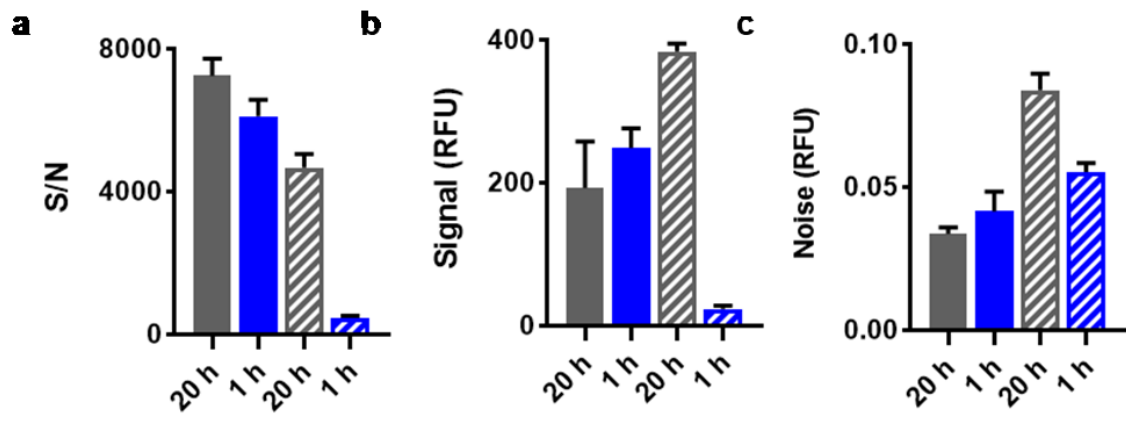

Figure S4. Comparison of dot blots of actin diluted in water (solid) versus dot blots of actin diluted in electrophoresis gel (hatched) with 3.3  $\mu\text{g}/\text{mL}$  actin. The S/N (a), signal (b), and noise (c) values calculated and plotted demonstrating the effect on protein binding and protein loss seen with the non-crosslinked fast immunoassay.
